# Supplementary material
Source: PubMed Central journal article supplement (PMC4819334)
Supplement: NIHMS719823-supplement.pdf [file NIHMS719823-supplement.pdf]

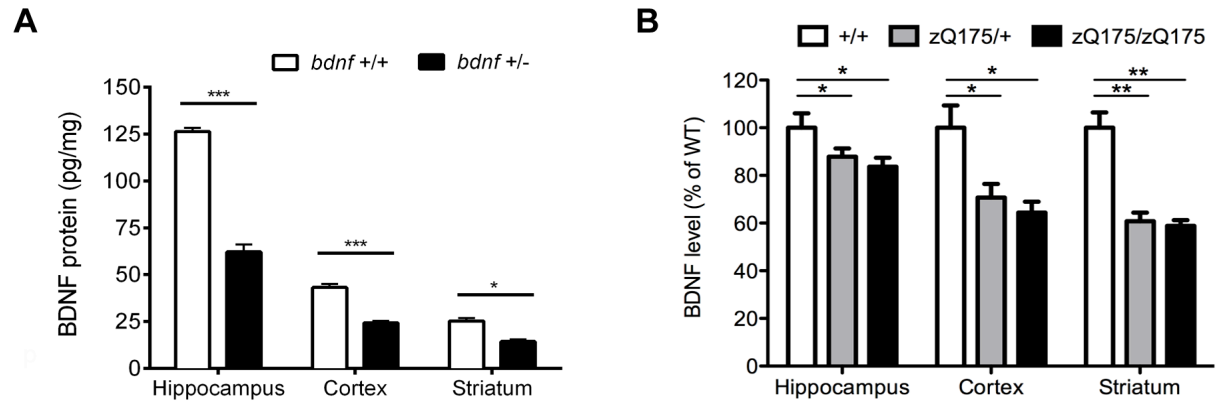

**Supplemental Figure 1. Quantification of total BDNF protein level by ELISA.** (A) The sensitivity and accuracy of BDNF ELISA (Promega) to measure the level of total BDNF in different brain region is validated using tissues from 5-month-old *bdnf* +/- mice and wild type littermates. (B) Total BDNF level from the hippocampus, the cortex, and the striatum of zQ175 mice are all decreased significantly compared to wild type littermates at the age of 12 months.

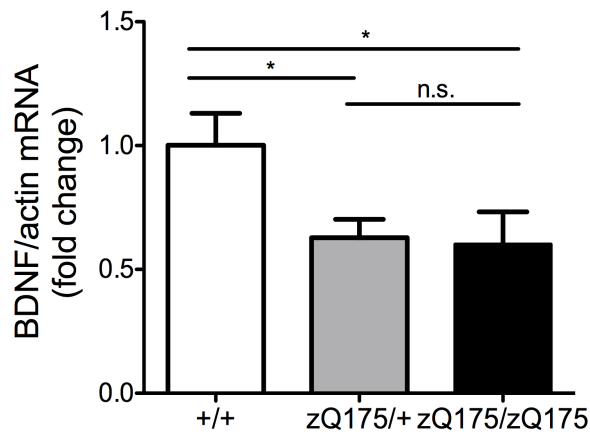

**Supplemental Figure 2. Reduced BDNF transcription in the cortex of 12-month-old zQ175 mice by quantitative PCR analysis.** Total *bdnf* mRNA from the cortices of zQ175 mice decreases significantly at the age of 12 months compared with wild type, as measured by real-time quantitative RT-PCR. All samples were normalized to  $\beta$ -actin mRNA level and results are mean $\pm$ S.E.M. relative to wild type (N=3 of each genotype \*P<0.05, two-way ANOVA followed by Bonferroni's post-test).

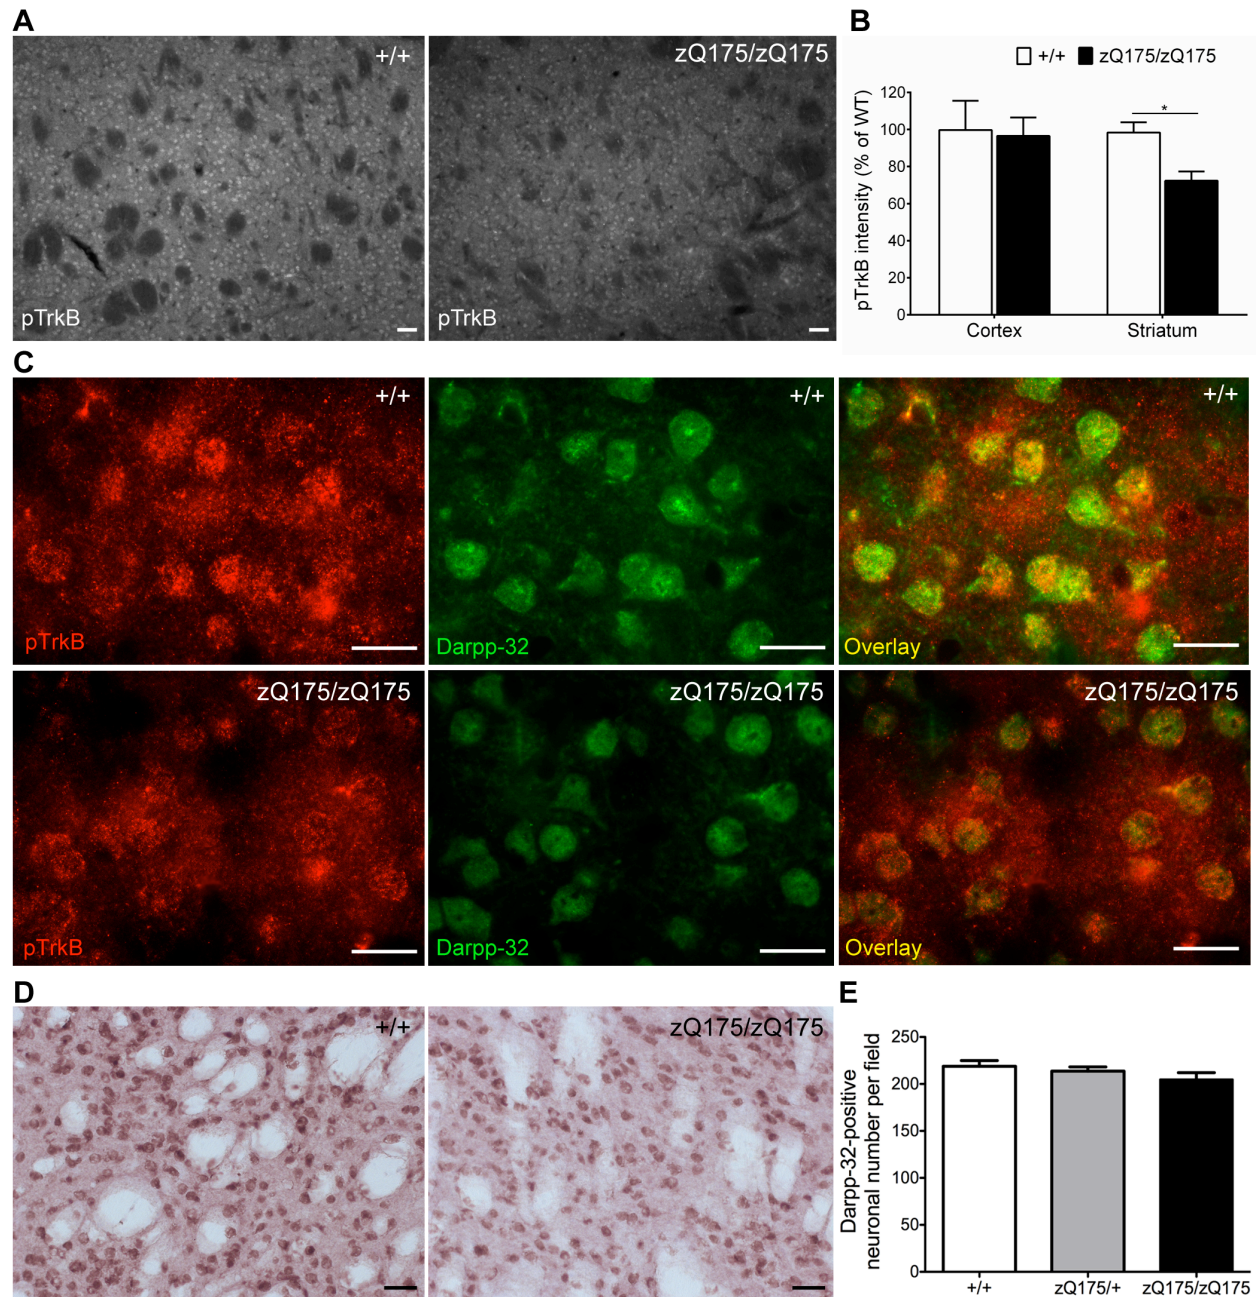

**Supplemental Figure 3. Reduction of TrkB phosphorylation in medium spiny neurons.** (A) Immunofluorescence detection of phosphorylated TrkB in the striatum of wild type (left panel) and zQ175 homozygous mice (right panel) at 12 months of age. The immunofluorescent intensity of pTrkB is decreased in the zQ175/zQ175 striatum, but not the cortex, as quantified in (B). (C) Double labeling of pTrkB and Darpp-32 (to detect medium spiny neurons) reveals that pTrkB signal is reduced in the cell bodies of medium spiny neurons of zQ175 homozygous mice compared to wild type. (D) Staining of Darpp-32-labeled medium spiny neurons in the caudate

putamen of wild type (left panel) and zQ175 homozygous mice (right panel) at the age of 12 months by immunohistochemistry. (E) Quantification of the number of Darpp-32 labeled cell bodies per field. The ~2% and ~7% decrease in Darpp-32-labeled neuronal number per field of zQ175 heterozygous and homozygous mice respectively does not reach statistical significance. Scale bar, 50 $\mu$ m (A), 20 $\mu$ m (C), 40 $\mu$ m (D).

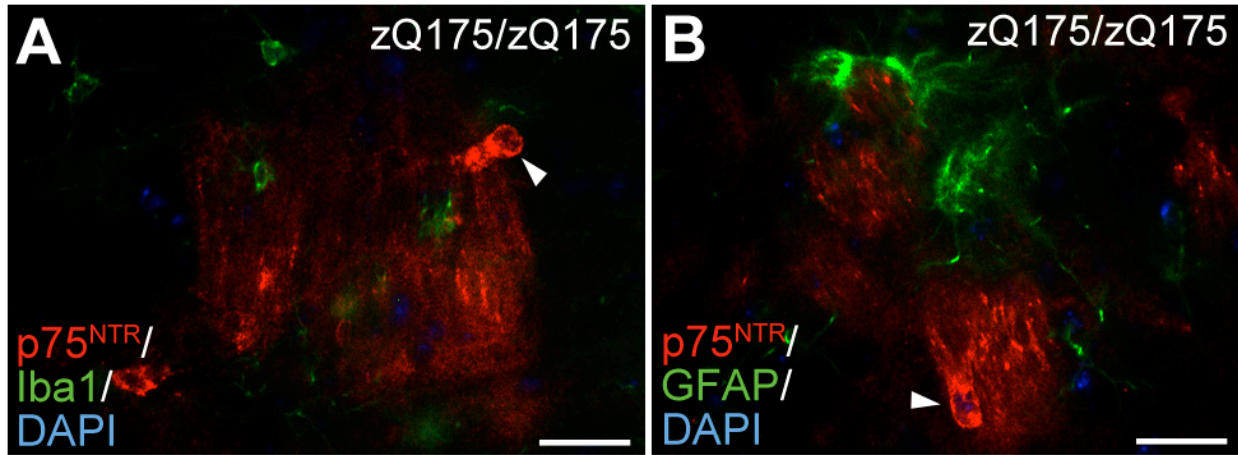

**Supplemental Figure 4. p75<sup>NTR</sup> is not upregulated in microglia or astrocytes in the striatum of zQ175 homozygous animals at 12 months of age.** Double immunofluorescence microscopy indicates that p75<sup>NTR</sup> does not co-localize with Iba1 (microglial marker) (A) or GFAP (astrocyte marker) (B) in the zQ175 HD striatum at 12 months. Scale bar, 20 $\mu$ m.

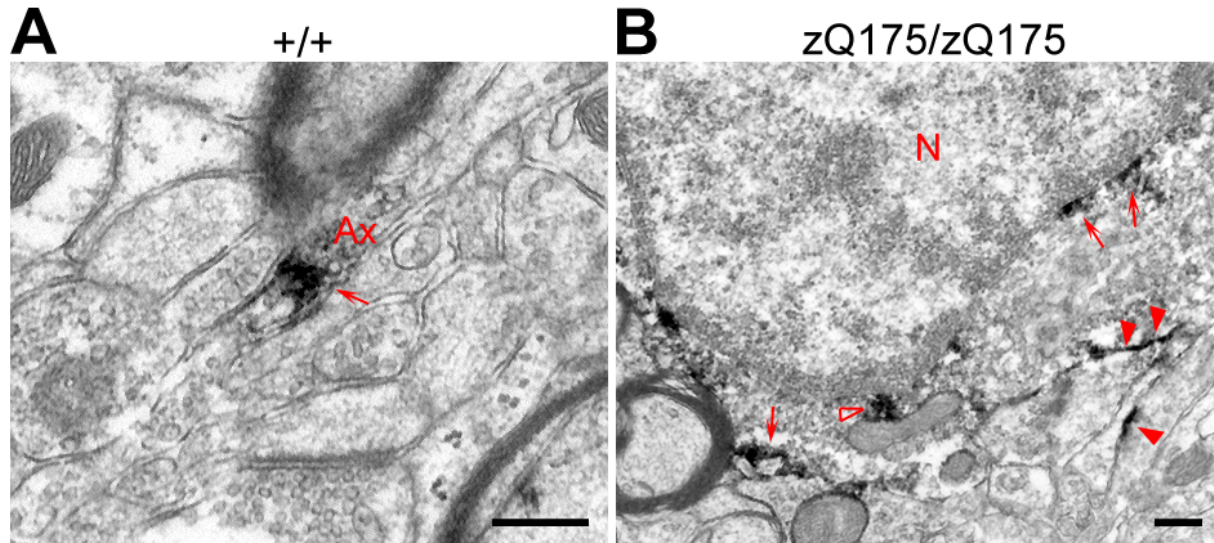

**Supplemental Figure 5. Ultrastructural immunolabeling of p75<sup>NTR</sup> in the striatum of wild type and zQ175 homozygous mice at 12 months of age.** (A) In the striatum of wild type mice, p75<sup>NTR</sup>-immunoreactivity (arrow) is primarily detected in axons (Ax) where it is affiliated with small synaptic vesicles (arrow). (B) In the striatum of zQ175/zQ175 mice, p75<sup>NTR</sup>-immunoreactivity is detected in the cytoplasm of oligodendrocyte perikarya, where it is affiliated with the nuclear membrane (arrows), the plasma membrane (closed arrowheads) and near mitochondria (open arrowhead). N=nucleus. Scale bar, 250nm.

**Supplemental Table 1.**

**Summary of prior studies of BDNF levels in genetic mouse models of HD**

| HD model                    | Animal model | Age                                 | Brain region | BDNF content | Method      | Change  | Reference |    |
|-----------------------------|--------------|-------------------------------------|--------------|--------------|-------------|---------|-----------|----|
| Full-length Transgenic Mice | YAC72        | 9m                                  | Cortex       | mRNA         | qPCR        | ↓       | 24        |    |
|                             |              |                                     | Cortex       | protein      | ELISA       | ↓       |           |    |
|                             |              | 3m                                  | Cortex       | mRNA         | RT-PCR      | ↓       | 9         |    |
|                             |              | 16m                                 | Cortex       | protein      | ELISA       | →       | 15        |    |
|                             |              |                                     | Striatum     | protein      | ELISA       | ↑       |           |    |
|                             | YAC128       | 16m                                 | Cortex       | mRNA         | ISH         | →       | 21        |    |
|                             |              |                                     | Cortex       | protein      | WB          | →       |           |    |
|                             |              |                                     | Striatum     | protein      | WB          | ↓       |           |    |
|                             | BACHD        | 8m                                  | Striatum     | protein      | WB          | ↓       | 17        |    |
|                             |              | 6m                                  | Cortex       | mRNA         | qPCR        | ↓       | 8         |    |
|                             |              | 2,4,6 m                             | Cortex       | mRNA         | qPCR        | ↓       | 4         |    |
|                             |              |                                     | Cortex       | protein      | ELISA       | ↓       |           |    |
|                             |              | 6-8m                                | Cortex       | mRNA         | qPCR        | →       | 13        |    |
|                             |              |                                     | Cortex       | protein      | WB          | →       |           |    |
|                             |              |                                     | Striatum     | protein      | WB          | →       |           |    |
|                             |              | N-terminal Fragment Transgenic Mice | R6/2         | 12wk         | Total brain | protein | ELISA     | ↓  |
|                             | 6,8,12wk     |                                     |              | Cortex       | mRNA        | RT-PCR  | ↓         | 23 |
|                             |              |                                     |              | Cortex       | protein     | ELISA   | →         | 15 |
| 13wk                        | Striatum     |                                     |              | protein      | ELISA       | →       |           |    |
|                             | 10wk         |                                     |              | Cortex       | mRNA        | qPCR    | ↓         | 1  |
| Cortex                      |              |                                     |              | protein      | WB          | ↓       |           |    |
| 13wk                        | Cortex       |                                     |              | mRNA         | qPCR        | ↓       | 6         |    |
|                             | Cortex       |                                     |              | protein      | ELISA       | ↓       |           |    |
|                             | Striatum     |                                     | mRNA         | qPCR         | ↓           |         |           |    |
|                             | Striatum     |                                     | protein      | ELISA        | ↓           |         |           |    |
| R6/1                        | 5m           |                                     | Cortex       | protein      | WB          | →       | 19        |    |
|                             |              |                                     | Striatum     | protein      | WB          | ↓       |           |    |
|                             | 6m           |                                     | Striatum     | protein      | ELISA       | ↓       | 3         |    |
|                             | 5m           |                                     | Striatum     | protein      | ELISA       | →       | 12        |    |
|                             |              | Hippocampus                         | protein      | ELISA        | →           |         |           |    |
| Cortex                      | protein      | ELISA                               | ↑            |              |             |         |           |    |

|               |                 |          |             |          |         |       |    |    |
|---------------|-----------------|----------|-------------|----------|---------|-------|----|----|
|               |                 |          | Striatum    | mRNA     | qPCR    | ↓     |    |    |
|               |                 |          | Hippocampus | mRNA     | qPCR    | ↓     |    |    |
|               |                 |          | Cortex      | mRNA     | qPCR    | ↓     |    |    |
|               | N171-82Q        | 4m       |             | Cortex   | mRNA    | qPCR  | ↓  | 4  |
|               |                 |          |             | Cortex   | protein | ELISA | ↓  |    |
|               |                 |          |             | Striatum | protein | ELISA | ↓  |    |
|               |                 | 4m       |             | Cortex   | protein | WB    | ↓  | 14 |
|               |                 |          |             | Striatum | protein | WB    | →* |    |
|               |                 | 3m       |             | Cortex   | protein | ELISA | ↓  | 5  |
|               | Striatum        |          |             | protein  | ELISA   | ↓     |    |    |
| Knock-in Mice | Hdh<br>111/111  | 5m       | Cortex      | protein  | ELISA   | ↓     | 7  |    |
|               |                 |          | Striatum    | protein  | WB      | ↓     |    |    |
|               |                 | 3m       | Total brain | protein  | ELISA   | →*    | 2  |    |
|               |                 | 2m       | Hippocampus | protein  | WB      | ↓     | 11 |    |
|               | Hdh<br>(CAG140) | 2m       | Hippocampus | protein  | WB      | ↓     | 16 |    |
|               | zQ175           | 5-6m     | Cortex      | mRNA     | qPCR    | →     | 13 |    |
|               |                 | 12m      | Hippocampus | protein  | ELISA   | →     | 18 |    |
|               |                 |          | Cortex      | protein  | ELISA   | →     |    |    |
|               | Striatum        | protein  | ELISA       | ↓        |         |       |    |    |
|               | HdhQ200         | 100 wk   | Forebrain   | mRNA     | qPCR    | ↓     | 20 |    |
| HdhQ250       | 6,9,12m         | Cortex   | protein     | ELISA    | ↓       | 10    |    |    |
|               |                 | Striatum | protein     | ELISA    | ↓       |       |    |    |

**Supplemental Table 1. Summary of part of the literatures regarding BDNF levels in different HD mouse models.** m, months; wk, weeks; qPCR, quantitative polymerase chain reaction; RT-PCR, reverse-transcriptase-polymerase chain reaction; ELISA, enzyme-linked immunosorbent assay; WB, Western blot analysis; ISH, in-situ hybridization; ↓, decrease; →, no change; ↑, increase; \*, slight but non-significant decrease.



## Supplemental References:

1. Apostol BL, Simmons DA, Zuccato C, Illes K, Pallos J, Casale M, Conforti P, Ramos C, Roarke M, Kathuria S, Cattaneo E, Marsh JL, Thompson LM (2008) CEP-1347 reduces mutant huntingtin-associated neurotoxicity and restores BDNF levels in R6/2 mice. *Molecular and cellular neurosciences* 39:8-20.
2. Borrell-Pages M, Zala D, Humbert S, Saudou F (2006) Huntington's disease: from huntingtin function and dysfunction to therapeutic strategies. *Cell Mol Life Sci* 63:2642-2660.
3. Canals JM, Pineda JR, Torres-Peraza JF, Bosch M, Martin-Ibanez R, Munoz MT, Mengod G, Ernfors P, Alberch J (2004) Brain-derived neurotrophic factor regulates the onset and severity of motor dysfunction associated with enkephalineric neuronal degeneration in Huntington's disease. *The Journal of neuroscience : the official journal of the Society for Neuroscience* 24:7727-7739.
4. Conforti P, Mas Monteys A, Zuccato C, Buckley NJ, Davidson B, Cattaneo E (2013) In vivo delivery of DN:REST improves transcriptional changes of REST-regulated genes in HD mice. *Gene Ther* 20:678-685.
5. Duan W, Guo Z, Jiang H, Ware M, Li XJ, Mattson MP (2003) Dietary restriction normalizes glucose metabolism and BDNF levels, slows disease progression, and increases survival in huntingtin mutant mice. *Proceedings of the National Academy of Sciences of the United States of America* 100:2911-2916.
6. Giampa C, Montagna E, Dato C, Melone MA, Bernardi G, Fusco FR (2013) Systemic delivery of recombinant brain derived neurotrophic factor (BDNF) in the R6/2 mouse model of Huntington's disease. *PloS one* 8:e64037.
7. Gines S, Seong IS, Fossale E, Ivanova E, Trettel F, Gusella JF, Wheeler VC, Persichetti F, MacDonald ME (2003) Specific progressive cAMP reduction implicates energy deficit in presymptomatic Huntington's disease knock-in mice. *Human molecular genetics* 12:497-508.
8. Gray M, Shirasaki DI, Cepeda C, Andre VM, Wilburn B, Lu XH, Tao J, Yamazaki I, Li SH, Sun YE, Li XJ, Levine MS, Yang XW (2008) Full-length human mutant huntingtin with a stable polyglutamine repeat can elicit progressive and selective neuropathogenesis in BACHD mice. *The Journal of neuroscience : the official journal of the Society for Neuroscience* 28:6182-6195.
9. Hermel E, Gafni J, Propp SS, Leavitt BR, Wellington CL, Young JE, Hackam AS, Logvinova AV, Peel AL, Chen SF, Hook V, Singaraja R, Krajewski S, Goldsmith PC, Ellerby HM, Hayden MR, Bredesen DE, Ellerby LM (2004) Specific caspase interactions and amplification are involved in selective neuronal vulnerability in Huntington's disease. *Cell Death Differ* 11:424-438.
10. Jin J, Peng Q, Hou Z, Jiang M, Wang X, Langseth AJ, Tao M, Barker PB, Mori S, Bergles DE, Ross CA, Detloff PJ, Zhang J, Duan W (2015) Early white matter abnormalities, progressive brain pathology and motor deficits in a novel knock-in mouse model of Huntington's disease. *Human molecular genetics*.
11. Lynch G, Kramar EA, Rex CS, Jia Y, Chappas D, Gall CM, Simmons DA (2007) Brain-derived neurotrophic factor restores synaptic plasticity in a knock-in mouse model of Huntington's disease. *The Journal of neuroscience : the official journal of the Society for Neuroscience* 27:4424-4434.

12. Pang TY, Stam NC, Nithianantharajah J, Howard ML, Hannan AJ (2006) Differential effects of voluntary physical exercise on behavioral and brain-derived neurotrophic factor expression deficits in Huntington's disease transgenic mice. *Neuroscience* 141:569-584.
13. Plotkin JL, Day M, Peterson JD, Xie Z, Kress GJ, Rafalovich I, Kondapalli J, Gertler TS, Flajolet M, Greengard P, Stavarache M, Kaplitt MG, Rosinski J, Chan CS, Surmeier DJ (2014) Impaired TrkB receptor signaling underlies corticostriatal dysfunction in Huntington's disease. *Neuron* 83:178-188.
14. Saydoff JA, Garcia RA, Browne SE, Liu L, Sheng J, Brenneman D, Hu Z, Cardin S, Gonzalez A, von Borstel RW, Gregorio J, Burr H, Beal MF (2006) Oral uridine pro-drug PN401 is neuroprotective in the R6/2 and N171-82Q mouse models of Huntington's disease. *Neurobiology of disease* 24:455-465.
15. Seo H, Kim W, Isacson O (2008) Compensatory changes in the ubiquitin-proteasome system, brain-derived neurotrophic factor and mitochondrial complex II/III in YAC72 and R6/2 transgenic mice partially model Huntington's disease patients. *Human molecular genetics* 17:3144-3153.
16. Simmons DA, Rex CS, Palmer L, Pandyarajan V, Fedulov V, Gall CM, Lynch G (2009) Up-regulating BDNF with an ampakine rescues synaptic plasticity and memory in Huntington's disease knockin mice. *Proceedings of the National Academy of Sciences of the United States of America* 106:4906-4911.
17. Simmons DA, Belichenko NP, Yang T, Condon C, Monbureau M, Shamloo M, Jing D, Massa SM, Longo FM (2013) A small molecule TrkB ligand reduces motor impairment and neuropathology in R6/2 and BACHD mouse models of Huntington's disease. *The Journal of neuroscience : the official journal of the Society for Neuroscience* 33:18712-18727.
18. Smith GA, Rocha EM, McLean JR, Hayes MA, Izen SC, Isacson O, Hallett PJ (2014) Progressive axonal transport and synaptic protein changes correlate with behavioral and neuropathological abnormalities in the heterozygous Q175 KI mouse model of Huntington's disease. *Human molecular genetics* 23:4510-4527.
19. Spires TL, Grote HE, Varshney NK, Cordery PM, van Dellen A, Blakemore C, Hannan AJ (2004) Environmental enrichment rescues protein deficits in a mouse model of Huntington's disease, indicating a possible disease mechanism. *The Journal of neuroscience : the official journal of the Society for Neuroscience* 24:2270-2276.
20. Tallaksen-Greene SJ, Sadagurski M, Zeng L, Mauch R, Perkins M, Banduseela VC, Lieberman AP, Miller RA, Paulson HL, Albin RL (2014) Differential effects of delayed aging on phenotype and striatal pathology in a murine model of Huntington disease. *The Journal of neuroscience : the official journal of the Society for Neuroscience* 34:15658-15668.
21. Xie Y, Hayden MR, Xu B (2010) BDNF overexpression in the forebrain rescues Huntington's disease phenotypes in YAC128 mice. *The Journal of neuroscience : the official journal of the Society for Neuroscience* 30:14708-14718.
22. Zhang Y, Li M, Drozda M, Chen M, Ren S, Mejia Sanchez RO, Leavitt BR, Cattaneo E, Ferrante RJ, Hayden MR, Friedlander RM (2003) Depletion of wild-type huntingtin in mouse models of neurologic diseases. *Journal of neurochemistry* 87:101-106.
23. Zuccato C, Liber D, Ramos C, Tarditi A, Rigamonti D, Tartari M, Valenza M, Cattaneo E (2005) Progressive loss of BDNF in a mouse model of Huntington's disease and rescue

by BDNF delivery. *Pharmacological research : the official journal of the Italian Pharmacological Society* 52:133-139.

24. Zuccato C, Ciammola A, Rigamonti D, Leavitt BR, Goffredo D, Conti L, MacDonald ME, Friedlander RM, Silani V, Hayden MR, Timmusk T, Sipione S, Cattaneo E (2001) Loss of huntingtin-mediated BDNF gene transcription in Huntington's disease. *Science* 293:493-498.
